# Supplementary material for: Clustering of single-cell multi-omics data with a multimodal deep learning method
Source: PubMed Central journal article supplement (PMC9748135; doi:10.1038/s41467-022-35031-9), 2022-12-13
Supplement: 41467_2022_35031_MOESM1_ESM.pdf [file 41467_2022_35031_MOESM1_ESM.pdf]

## Supplementary Figures

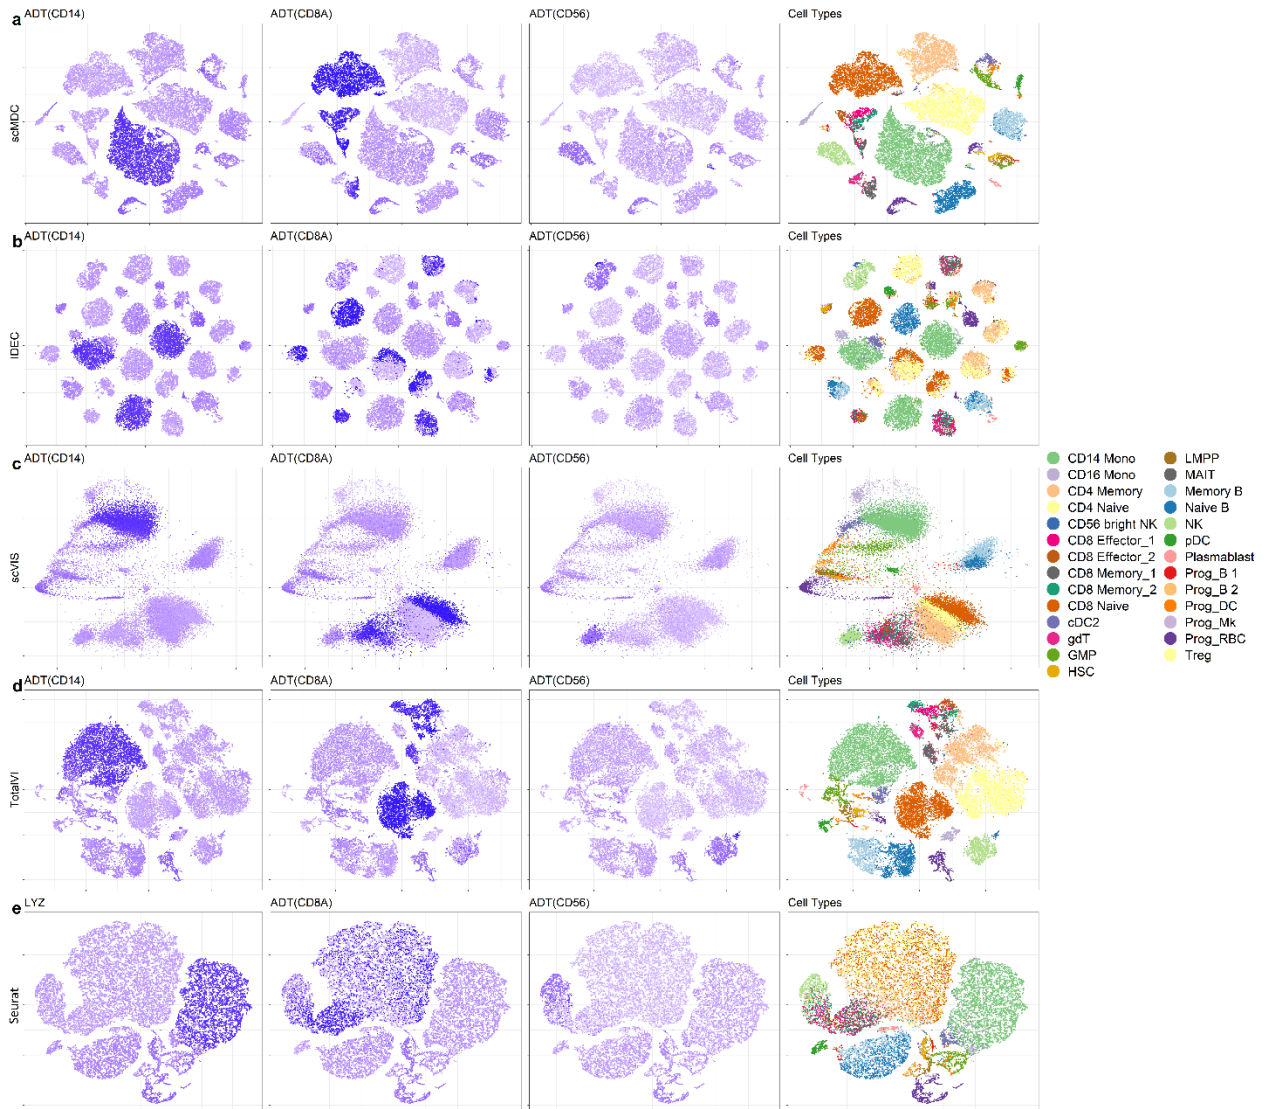

Supplementary Figure 1. Low-dimensional representation of scMDC and the competing methods on the BMNC dataset. The t-SNE plots of the embeddings from scMDC (a) and four competing methods including IDEC (b), scVIS (c), TotalVI (d), and Seurat (e) are shown in different rows. The first three columns show the expression pattern of ADT CD14, CD8A, and CD56. The last column shows the true labels (cell types) on the latent space of each method.

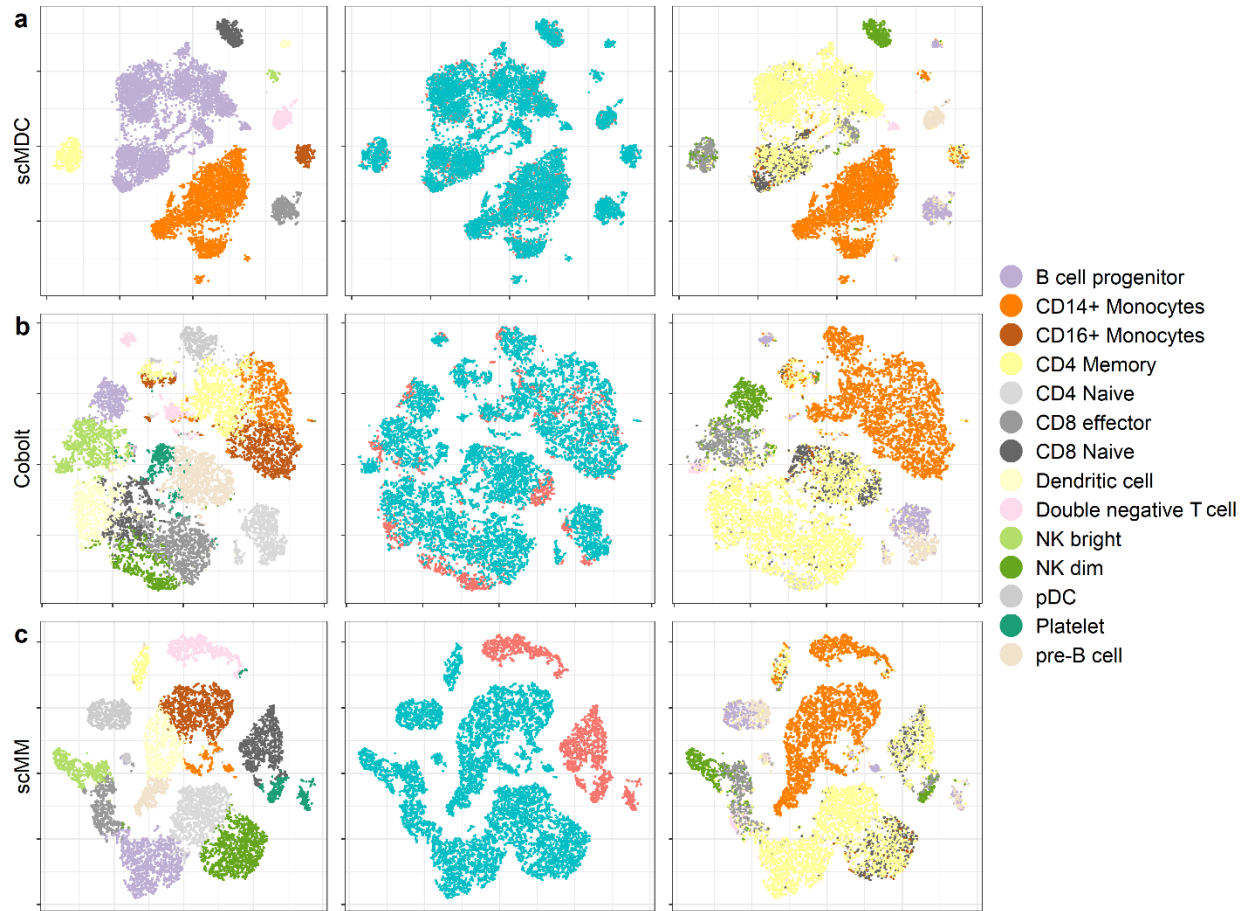

Supplementary Figure 2. Low-dimension representation of scMDC and the competing methods on the PBMC13K dataset. The t-SNE plots of the embeddings from scMDC (a) and two competing methods including Cobolt (b) and scMM (c) are shown in different rows. The three columns show the predicted labels, the batch IDs, and the true labels on the latent space of each method.

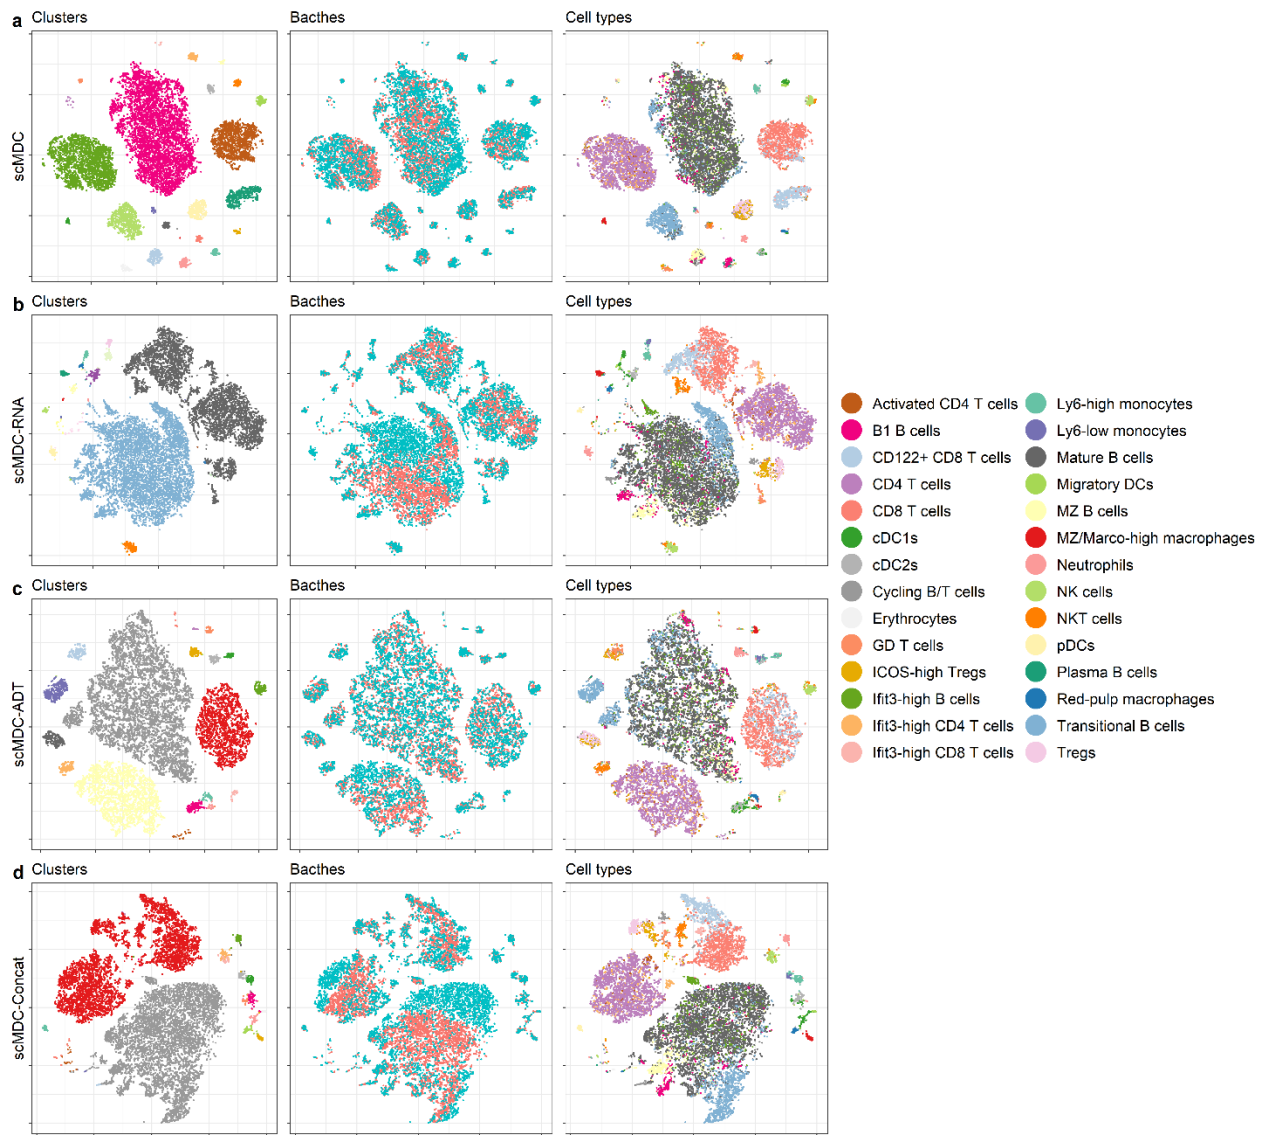

Supplementary Figure 3. Low-dimension representation of scMDC and the variant methods on the SLN111 dataset. The t-SNE plots of the embeddings from scMDC (a) and three competing methods including scMDC-RNA (b), scMDC-ADT (c), and scMDC-Concat (d) are shown in different rows. The three columns show the predicted labels, the batch IDs, and the true labels on the latent space of each method.

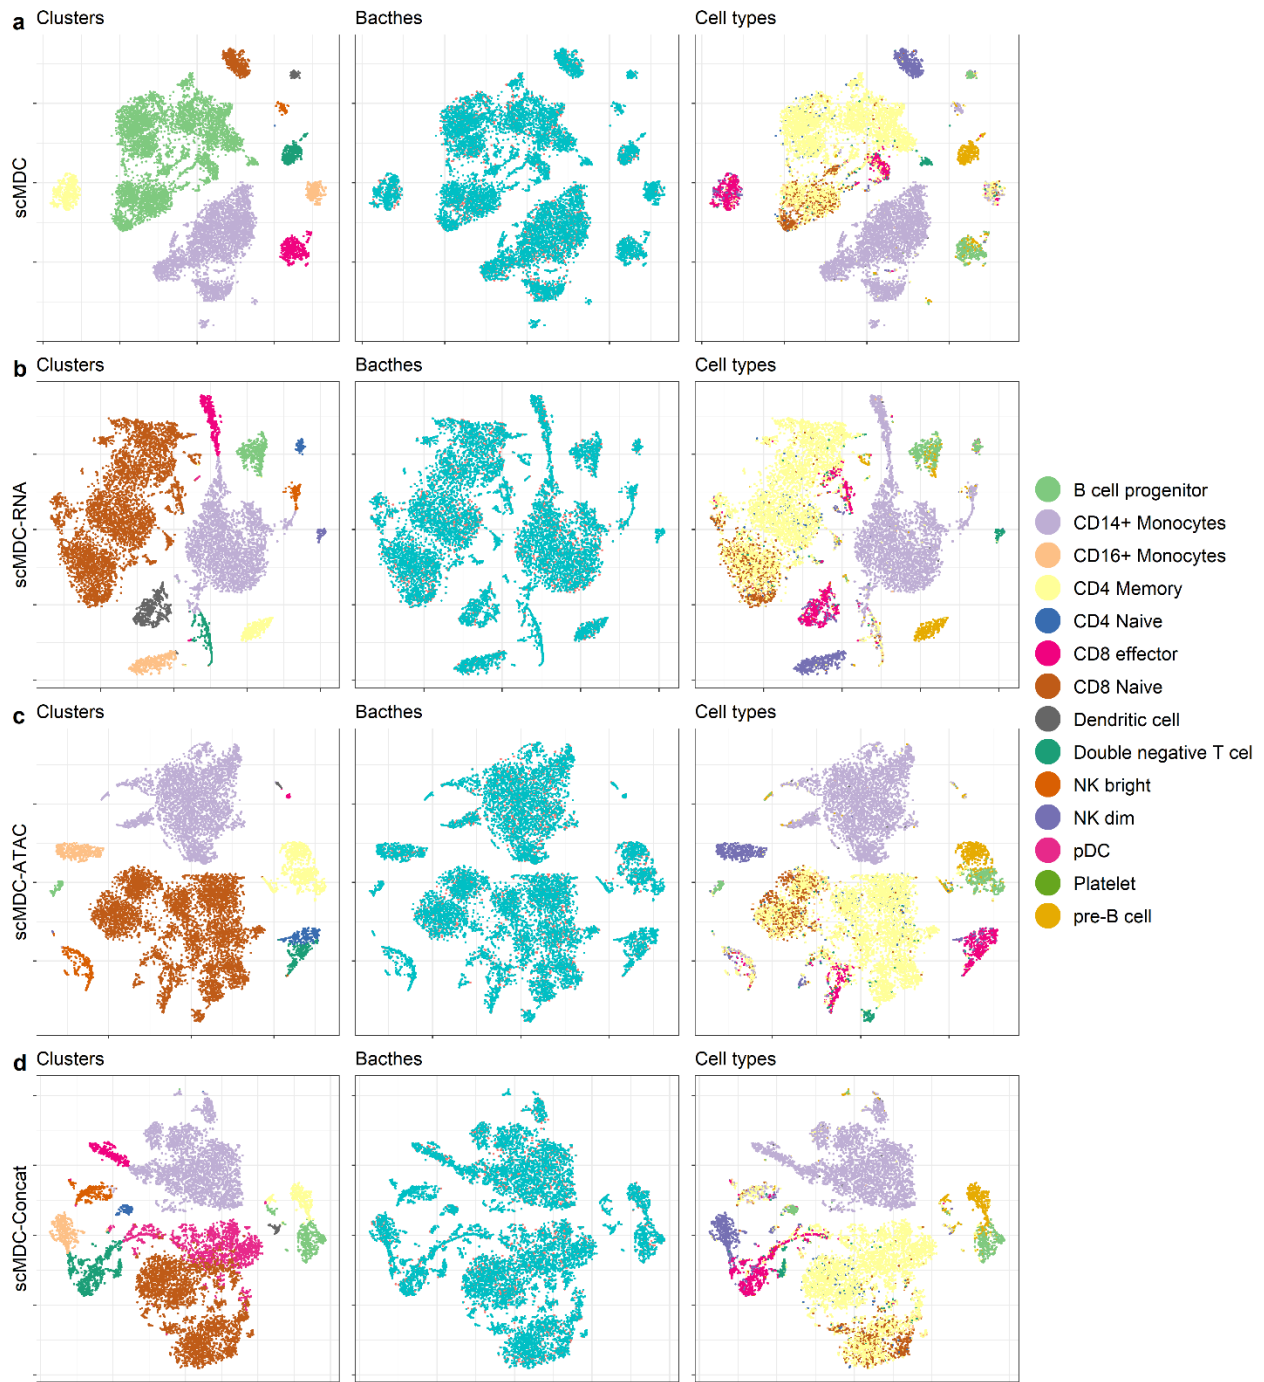

Supplementary Figure 4. Low-dimensional representation of scMDC and the variant methods on the PBMC13K dataset. The t-SNE plots of the embeddings from scMDC (a) and three competing methods including scMDC-RNA (b), scMDC-ATAC (c), and scMDC-Concat (d) are shown in different rows. The three columns show the predicted labels, the batch IDs, and the true labels on the latent space of each method.

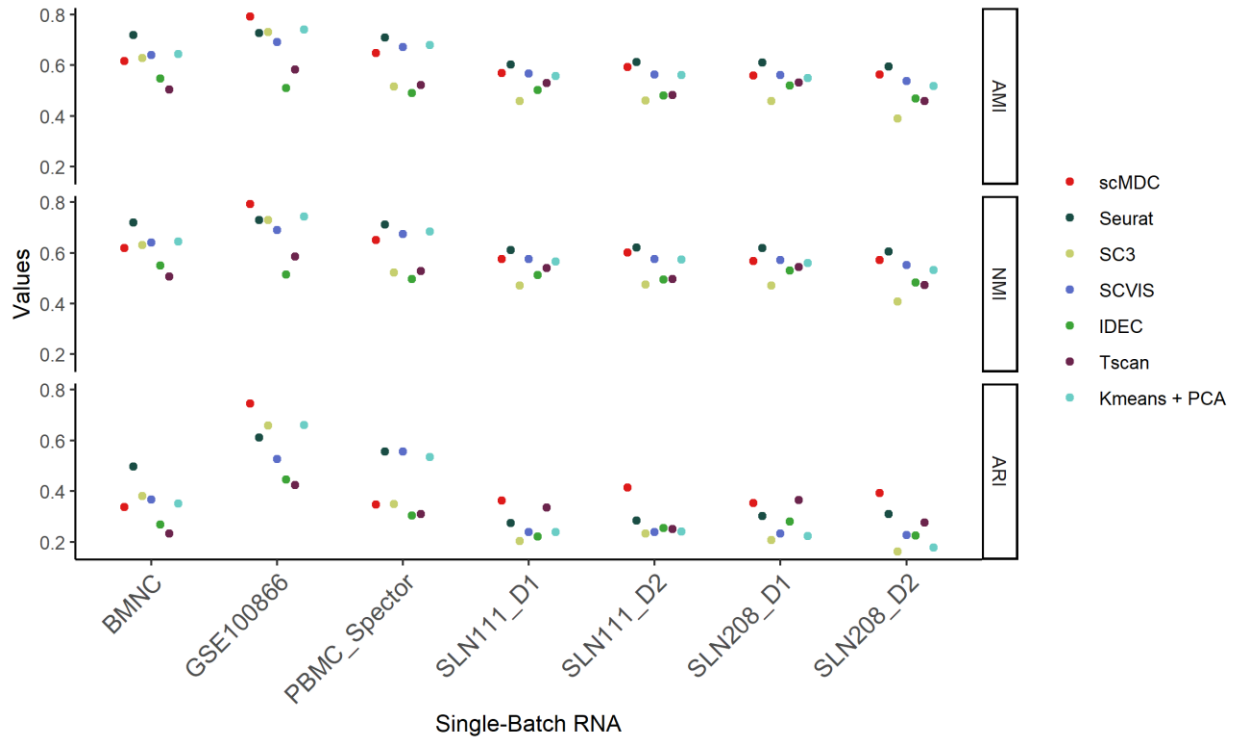

Supplementary Figure 5. Clustering performance of scMDC-RNA and six single-modal clustering methods on the single-batch CITE-seq datasets. All methods only take mRNA counts or normalized counts as input. Clustering performance is evaluated by AMI, NMI, and ARI. Source data are provided as a Source Data file.

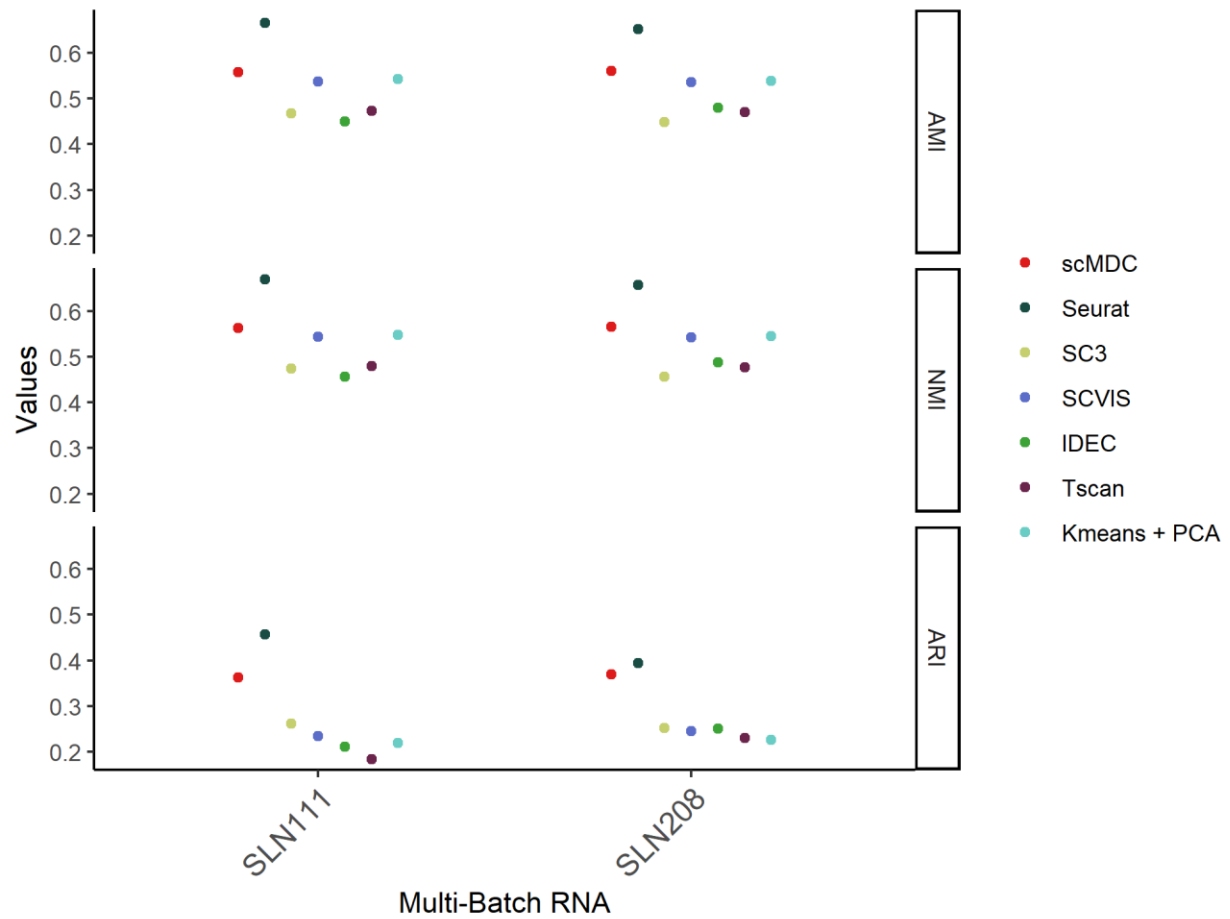

Supplementary Figure 6. Clustering performance of scMDC-RNA and six single-modal clustering methods on the multiple-batch CITE-seq datasets. All methods only take mRNA counts or normalized counts as input. Clustering performance is evaluated by AMI, NMI, and ARI. Source data are provided as a Source Data file.

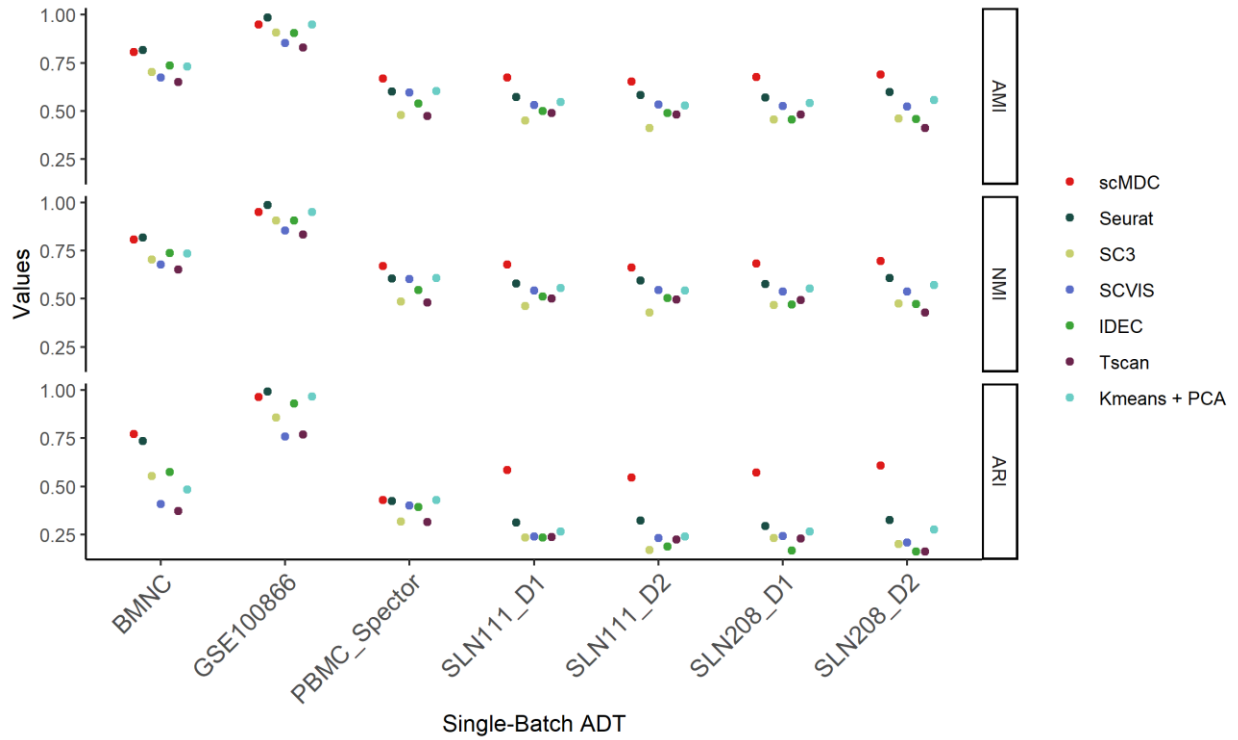

Supplementary Figure 7. Clustering performance of scMDC-ADT and six single-modal clustering methods on the single-batch CITE-seq datasets. All methods only take ADT counts or normalized counts as input. Clustering performance is evaluated by AMI, NMI, and ARI. Source data are provided as a Source Data file.

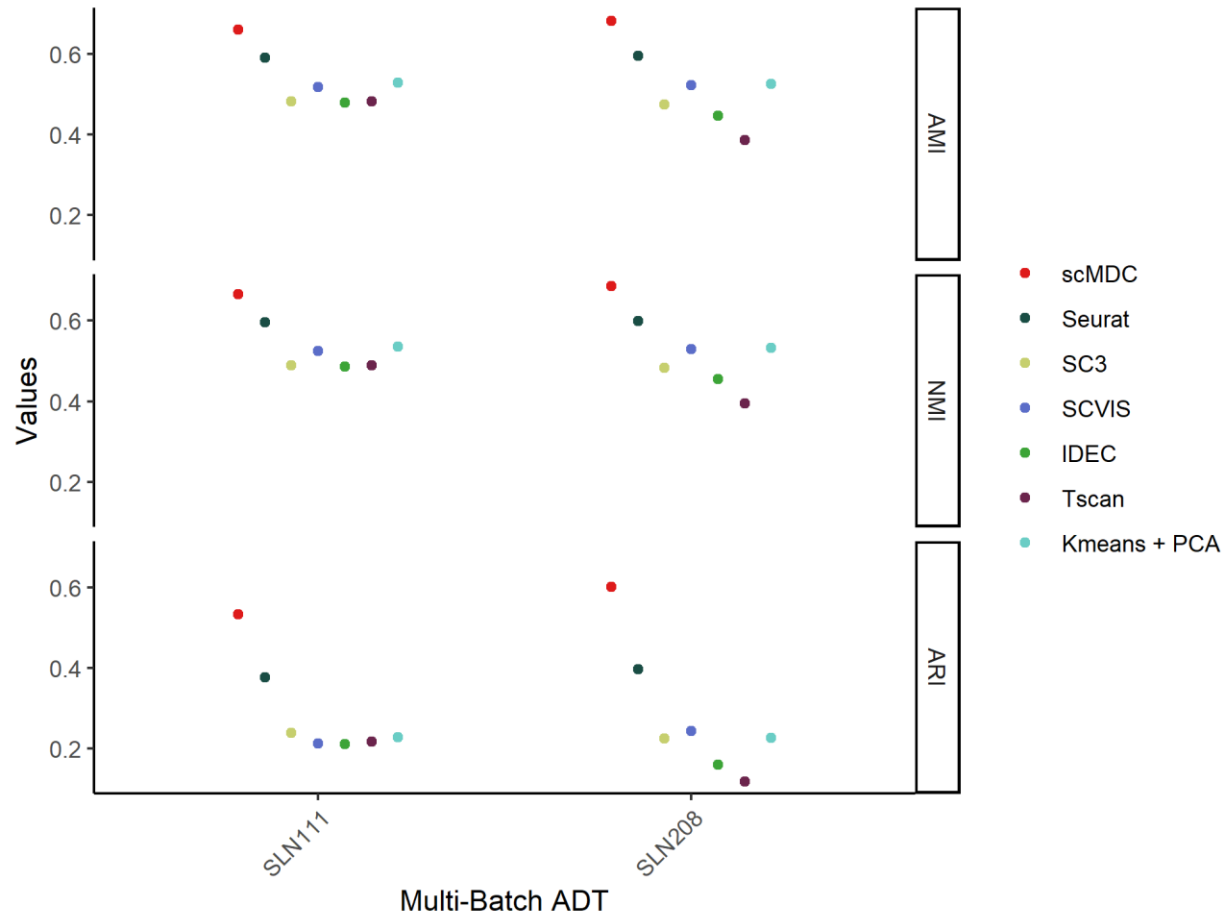

Supplementary Figure 8. Clustering performance of scMDC-ADT and six single-modal clustering methods on the multiple-batch CITE-seq datasets. All methods only take ADT counts or normalized counts as input. Clustering performance is evaluated by AMI, NMI, and ARI. Source data are provided as a Source Data file.



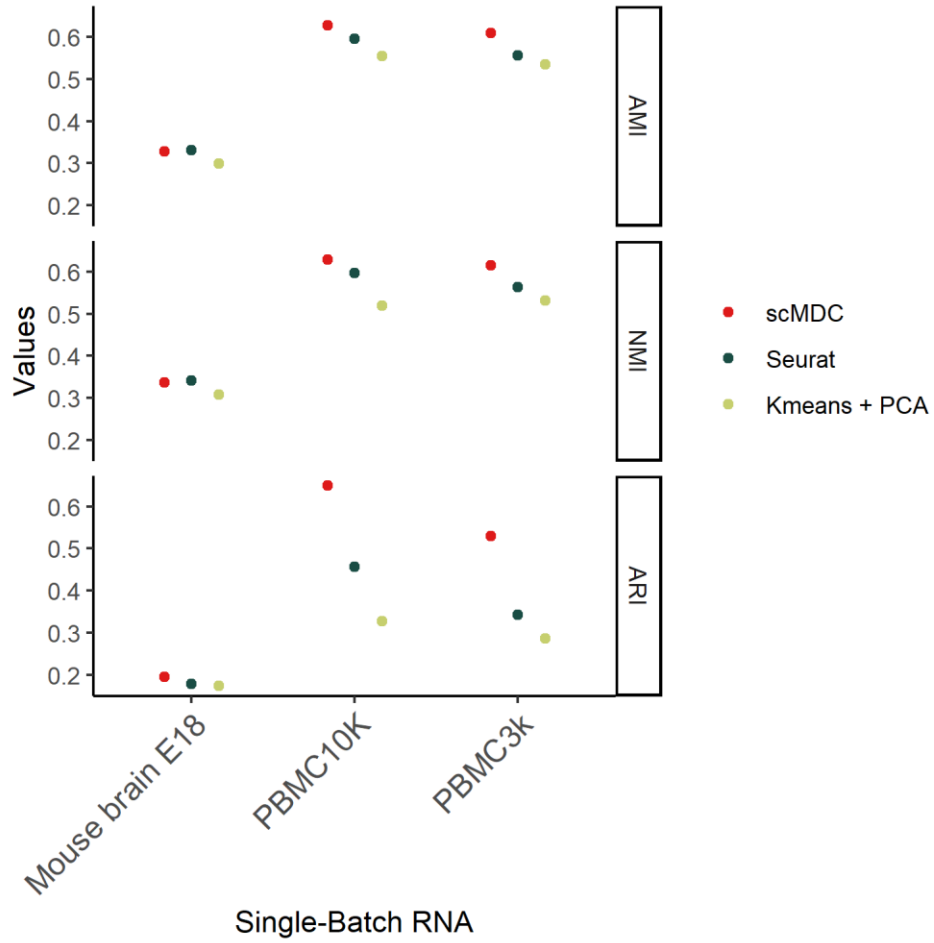

Supplementary Figure 9. Clustering performance of scMDC-RNA and two single-modal clustering methods on the single-batch SMAGE-seq datasets. All methods only take mRNA counts or normalized counts as input. Clustering performance is evaluated by AMI, NMI, and ARI. Source data are provided as a Source Data file.

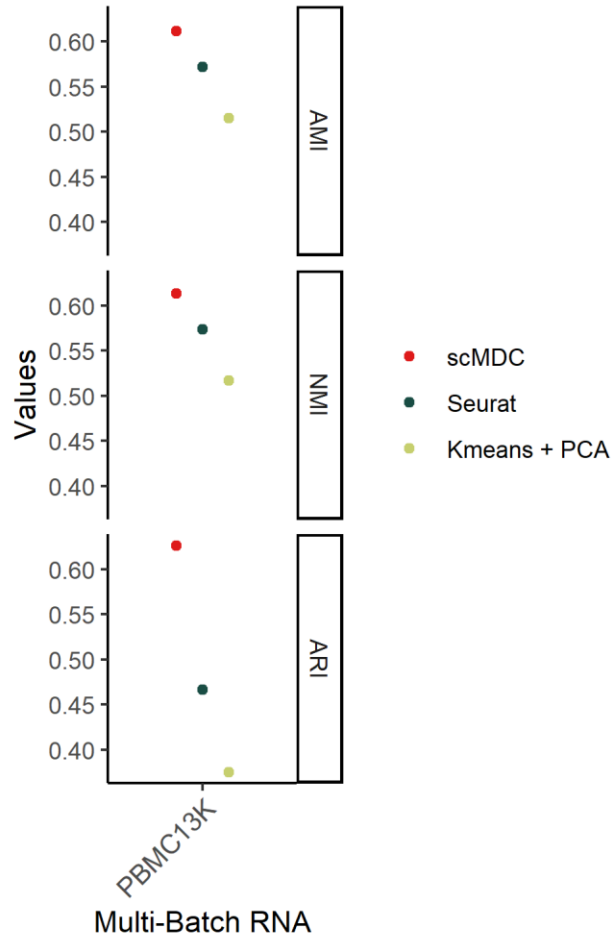

Supplementary Figure 10. Clustering performance of scMDC-RNA and two single-modal clustering methods on a multiple-batch SMAGE-seq dataset. All methods only take mRNA counts or normalized counts as input. Clustering performance is evaluated by AMI, NMI, and ARI. Source data are provided as a Source Data file.

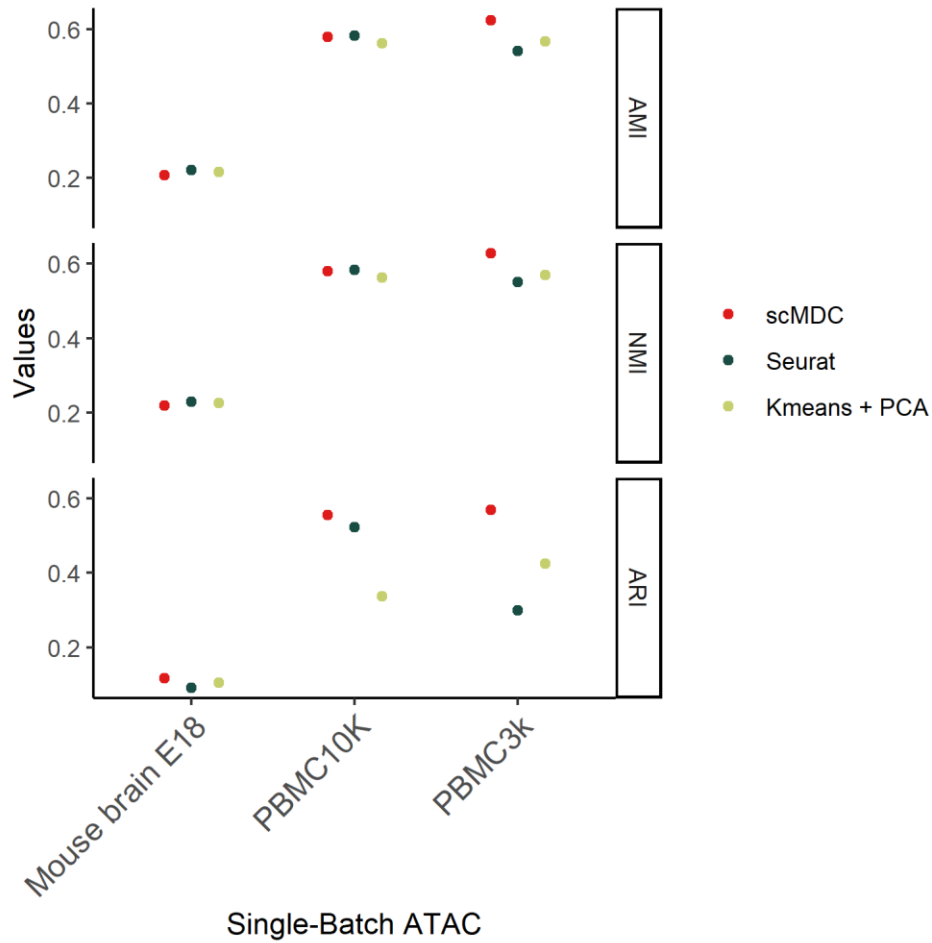

Supplementary Figure 11. Clustering performance of scMDC-ATAC and two single-modal clustering methods on the single-batch SMAGE-seq datasets. All methods only take ATAC counts or normalized counts as input. The ATAC counts are mapped to the gene regions. Clustering performance is evaluated by AMI, NMI, and ARI. Source data are provided as a Source Data file.

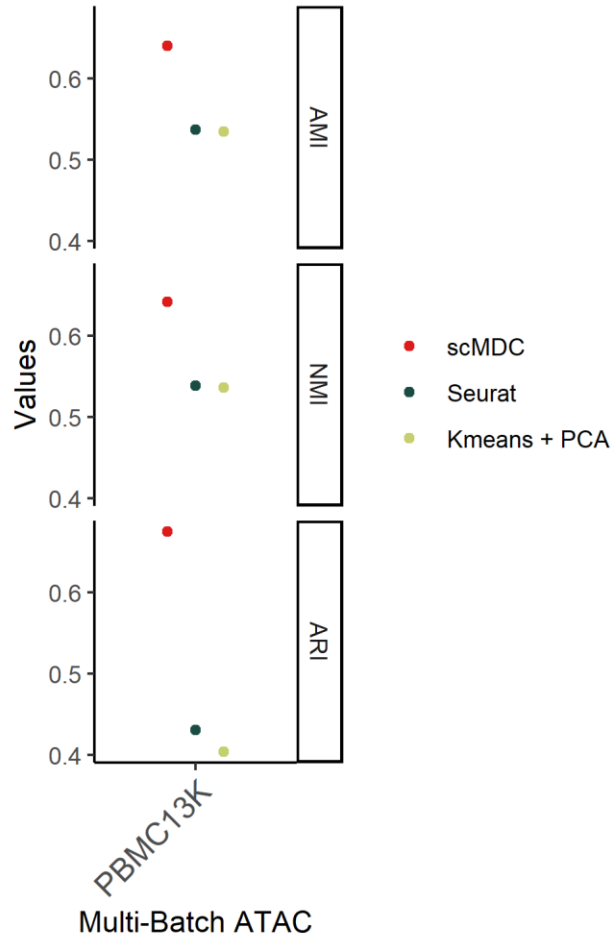

Supplementary Figure 12. Clustering performance of scMDC-ATAC and two single-modal clustering methods on a multiple-batch SMAGE-seq dataset. All methods only take ATAC counts or normalized counts as input. The ATAC counts are mapped to the gene regions. Clustering performance is evaluated by AMI, NMI, and ARI. Source data are provided as a Source Data file.

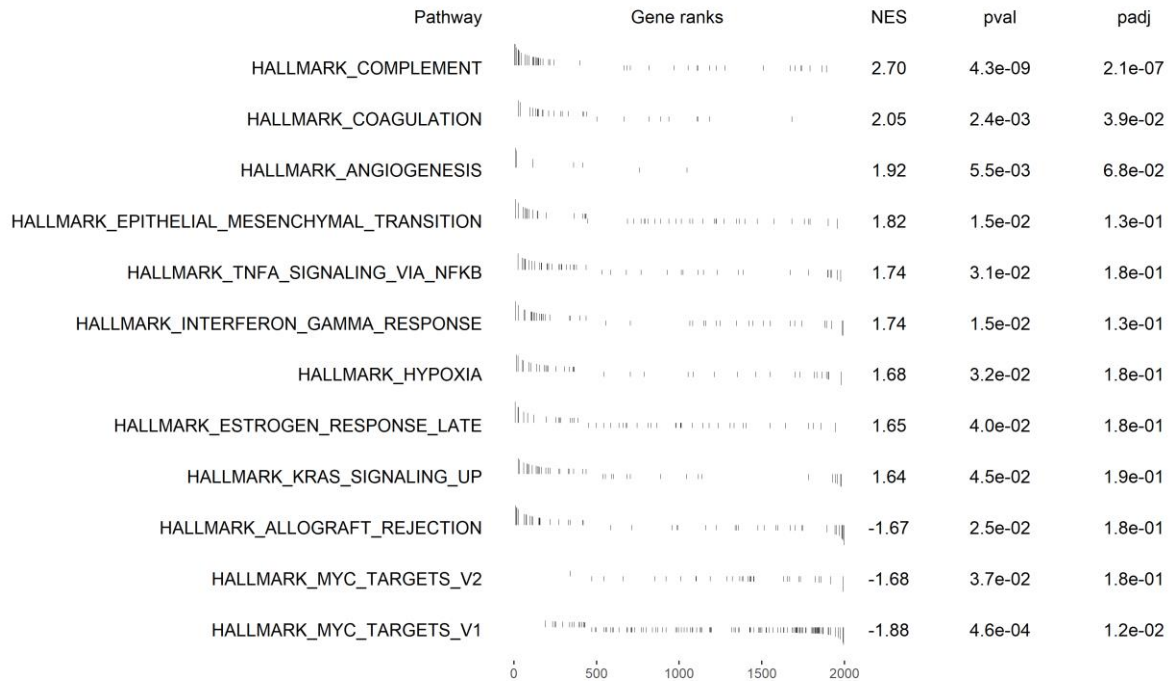

Supplementary Figure 13. Enrichment plot of Hallmark pathways in CD14 monocyte cells from the BMNC dataset. The Kolmogorov-Smirnov test is used here, and the nominal P-values are adjusted for multiple comparisons (padj) by Benjamini & Hochberg (BH) method. Pathways with nominal P-values < 0.05 are shown.

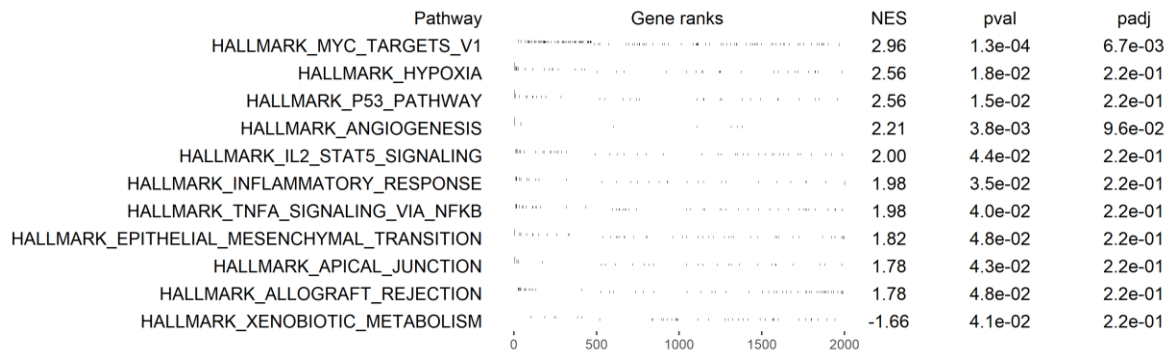

Supplementary Figure 14. Enrichment plot of Hallmark pathways in CD4 memory cells from the BMNC dataset. The Kolmogorov-Smirnov test is used here, and the nominal P-values are adjusted for multiple comparisons (padj) by Benjamini & Hochberg (BH) method. Pathways with nominal P-values < 0.05 are shown.

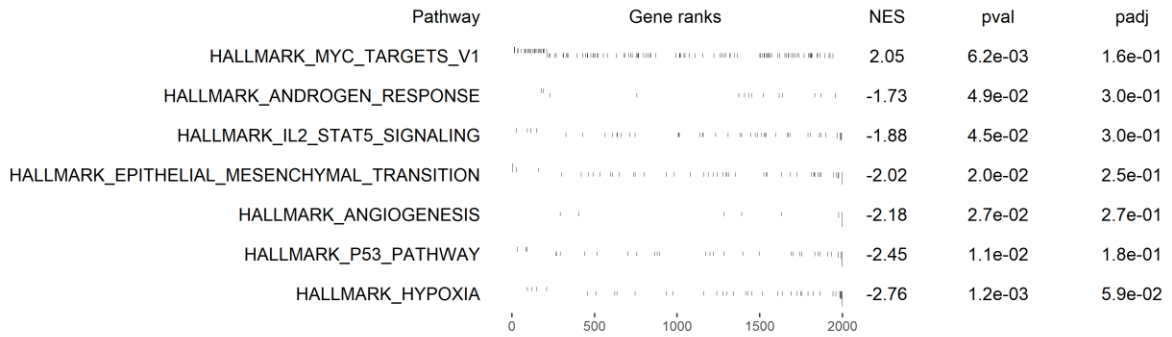

Supplementary Figure 15. Enrichment plot of Hallmark pathways in CD4 naive cells from the BMNC dataset. The Kolmogorov-Smirnov test is used here, and the nominal P-values are adjusted for multiple comparisons (padj) by Benjamini & Hochberg (BH) method. Pathways with nominal P-values < 0.05 are shown.

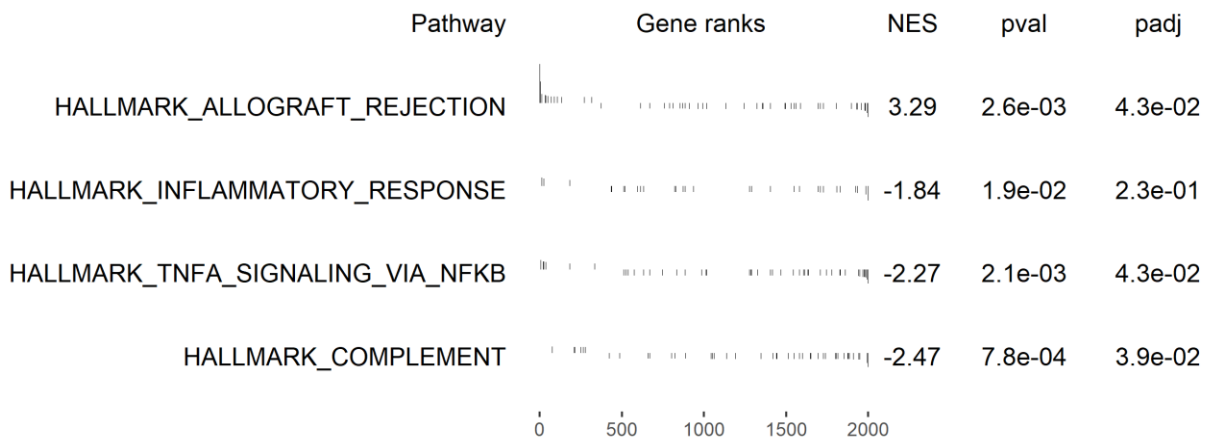

Supplementary Figure 16. Enrichment plot of Hallmark pathways in CD8 naive cells from the BMNC dataset. The Kolmogorov-Smirnov test is used here, and the nominal P-values are adjusted for multiple comparisons (padj) by Benjamini & Hochberg (BH) method. Pathways with nominal P-values < 0.05 are shown.

Supplementary tables

Supplementary Table 1. One-sided paired t-test between the clustering performance of scMDC and the competing methods for the CITE-seq datasets.

| <i>Methods</i>      | <i>p_AMI</i> | <i>p_NMI</i> | <i>p_ARI</i> |
|---------------------|--------------|--------------|--------------|
| <i>BREM-SC</i>      | 0.00402824   | 0.00355908   | 9.1677E-06   |
| <i>CiteFuse</i>     | 0.0079801    | 0.01111861   | 0.00036261   |
| <i>IDEC</i>         | 6.7698E-05   | 7.57E-05     | 5.7372E-07   |
| <i>Kmeans + PCA</i> | 2.1861E-05   | 2.1894E-05   | 6.0185E-05   |
| <i>SC3</i>          | 1.4569E-05   | 1.366E-05    | 2.2145E-05   |
| <i>SCVIS</i>        | 0.00025911   | 0.00030163   | 5.887E-06    |
| <i>Seurat</i>       | 0.00212642   | 0.00220737   | 0.00062321   |
| <i>Specter</i>      | 0.00015003   | 0.00010859   | 0.00161893   |
| <i>TotalVI</i>      | 0.01579666   | 0.0144765    | 0.00069109   |
| <i>Tscan</i>        | 2.0401E-05   | 2.4565E-05   | 1.9785E-05   |

Supplementary Table 2. One-sided paired t-test between the clustering performance of scMDC and the competing methods for the SMAGE-seq datasets.

| <i>Methods</i>      | <i>p_AMI</i> | <i>p_NMI</i> | <i>p_ARI</i> |
|---------------------|--------------|--------------|--------------|
| <i>Cobolt</i>       | 0.04201604   | 0.04327985   | 0.01847998   |
| <i>Kmeans + PCA</i> | 0.00932083   | 0.00834753   | 0.01511548   |
| <i>scMM</i>         | 0.00944043   | 0.00970153   | 0.01339524   |
| <i>Seurat</i>       | 0.01684468   | 0.01755079   | 0.01762545   |



Supplementary Table 3. One-sided paired t-test between the clustering performance of scMDC and the competing methods for the simulation datasets.

| <i>Methods</i>    | <i>p_AMI</i> | <i>p_NMI</i> | <i>p_ARI</i> |
|-------------------|--------------|--------------|--------------|
| <i>BREMSC</i>     | 0.00205187   | 0.00194259   | 6.9106E-05   |
| <i>CiteFuse</i>   | 3.9747E-06   | 3.9025E-06   | 2.7077E-05   |
| <i>iDEC</i>       | 5.5039E-07   | 5.4942E-07   | 9.7328E-07   |
| <i>PCA+Kmeans</i> | 0.00012266   | 0.00012191   | 0.00012582   |
| <i>SC3</i>        | 7.5575E-05   | 7.5267E-05   | 9.2593E-06   |
| <i>SCVIS</i>      | 4.3007E-05   | 4.2824E-05   | 9.334E-06    |
| <i>Seurat</i>     | 5.6212E-06   | 4.9064E-06   | 0.00022347   |
| <i>Specter</i>    | 1.2021E-06   | 1.4494E-06   | 1.1547E-05   |
| <i>TotalVI</i>    | 0.0028567    | 0.00282413   | 0.0248134    |
| <i>Tscan</i>      | 5.0904E-05   | 5.1844E-05   | 1.4705E-05   |

Supplementary Table 4. One-sided paired t-test between the clustering performance of scMDC and the competing methods for the model testing experiments.

| <i>Method1</i> | <i>Method2</i> | <i>Pval_AMI</i> | <i>Pval_NMI</i> | <i>Pval_ARI</i> |
|----------------|----------------|-----------------|-----------------|-----------------|
| <i>scMDC</i>   | ATAC           | 0.07041006      | 0.07245205      | 0.09195784      |
| <i>scMDC</i>   | Concat-ATAC    | 0.00194839      | 0.00135246      | 0.0296167       |
| <i>scMDC</i>   | RNA            | 0.00015569      | 0.00016842      | 0.00013612      |
| <i>scMDC</i>   | ADT            | 0.00124744      | 0.0011954       | 0.00185413      |
| <i>scMDC</i>   | Concat-ADT     | 9.0239E-06      | 9.9314E-06      | 8.4946E-06      |

Supplementary Table 5. One-sided paired t-test between the clustering performance of scMDC and the competing methods for the parameter tuning experiments.

| <i>Parameters</i> | <i>Values</i> | <i>pvals_ami</i> | <i>pvals_nmi</i> | <i>pvals_ari</i> |
|-------------------|---------------|------------------|------------------|------------------|
| <i>Fi</i>         | 0.0001        | 0.657522448      | 0.654359414      | 0.339330244      |
| <i>Fi</i>         | 0.001         | 0.061665126      | 0.061031154      | 0.15169793       |
| <i>Fi</i>         | 0.005         | 0.185708427      | 0.183215647      | 0.065754824      |
| <i>Fi</i>         | 0.01          | 0.721740687      | 0.721638474      | 0.172244312      |
| <i>Fi</i>         | 0.1           | 0.996335282      | 0.996328807      | 0.993537274      |
| <i>Fi</i>         | 1             | 0.999079993      | 0.99907693       | 0.998847524      |
| <i>Gamma</i>      | 0.01          | 0.404148719      | 0.402075548      | 0.465113431      |
| <i>Gamma</i>      | 0.1           | 0.020012276      | 0.019725304      | 0.027002903      |
| <i>Gamma</i>      | 1             | 0.273661585      | 0.272609533      | 0.211856888      |
| <i>Gamma</i>      | 10            | 0.505974017      | 0.505992115      | 0.565385718      |
| <i>Gamma</i>      | 100           | 0.859013414      | 0.858343271      | 0.82483211       |

Supplementary Table 6. Summary of the real CITE-seq datasets\*

| <b>Datasets</b> | <b>Platform</b> | <b>Tissue</b> | <b># of cells</b> | <b># of total genes</b> | <b># of ADTs</b> | <b># of groups</b> |
|-----------------|-----------------|---------------|-------------------|-------------------------|------------------|--------------------|
| PBMC            | 10X             | PBMC          | 3,762             | 33,538                  | 49               | 16                 |
| GSE100866       | 10X             | CBMN          | 1,372             | 33,514                  | 10               | 6                  |
| BMNC            | 10X             | BMNC          | 30,672            | 17,009                  | 25               | 27                 |
| SLN111D1        | 10X             | SLN           | 9,264             | 13,553                  | 111              | 35                 |
| SLN111D2        | 10X             | SLN           | 7,564             | 13,553                  | 111              | 35                 |
| SLN208D1        | 10X             | SLN           | 8,715             | 13,553                  | 208              | 35                 |
| SLN208D2        | 10X             | SLN           | 7,105             | 13,553                  | 208              | 35                 |

\* We selected top 1000 highly dispersed genes for experiments in all datasets

Supplementary Table 7. Summary of the real Single-cell Multiome ATAC Gene Expression datasets\*

| <b>Datasets</b> | <b>Platform</b> | <b>Tissue</b> | <b># of cells</b> | <b># of total genes</b> | <b># of genes from ATAC</b> | <b># of groups</b> |
|-----------------|-----------------|---------------|-------------------|-------------------------|-----------------------------|--------------------|
| PBMC3k          | 10X             | PBMC          | 2,585             | 36,601                  | 20,010                      | 14                 |
| PBMC10K         | 10X             | PBMC          | 11,020            | 36,601                  | 20,010                      | 12                 |
| MBE18           | 10X             | Brain         | 4,780             | 32,285                  | 21,807                      | 18                 |

\* We selected top 2000 highly dispersed genes for experiments in all datasets
